# Supplementary material for: Highly efficient visible-light photocatalytic activity of MoS2–TiO2 mixtures hybrid photocatalyst and functional properties
Source: Royal Society of Chemistry journal article supplement (doi:10.1039/c7ra03633g), 2017-01-01
Supplement: c7ra03633g1.pdf [file c7ra03633g1.pdf]

## Supplementary Information

### Highly efficient visible light photocatalytic activity of MoS<sub>2</sub>-TiO<sub>2</sub> mixtures hybrid photocatalyst and functional properties

M. Sabarinathan<sup>a, b</sup>, S. Harish<sup>a, b</sup>, J. Archana<sup>c</sup>, M. Navaneethan<sup>\*b</sup>,

H. Ikeda<sup>b</sup>, Y. Hayakawa<sup>\*a, b</sup>

<sup>a</sup>*Graduate School of Science and Technology, Shizuoka University, 3-5-1 Johoku,*

*Naka-ku, Hamamatsu, Shizuoka 432-8011, Japan.*

<sup>b</sup>*Research Institute of Electronics, Shizuoka University, 3-5-1 Johoku, Naka-ku, Hamamatsu,*

*Shizuoka 432-8011, Japan.*

<sup>c</sup>*SRM Research Institute, Department of Physics and Nanotechnology, SRM University,*

*Kattankulathur, Chennai, 603203, Tamilnadu, India.*

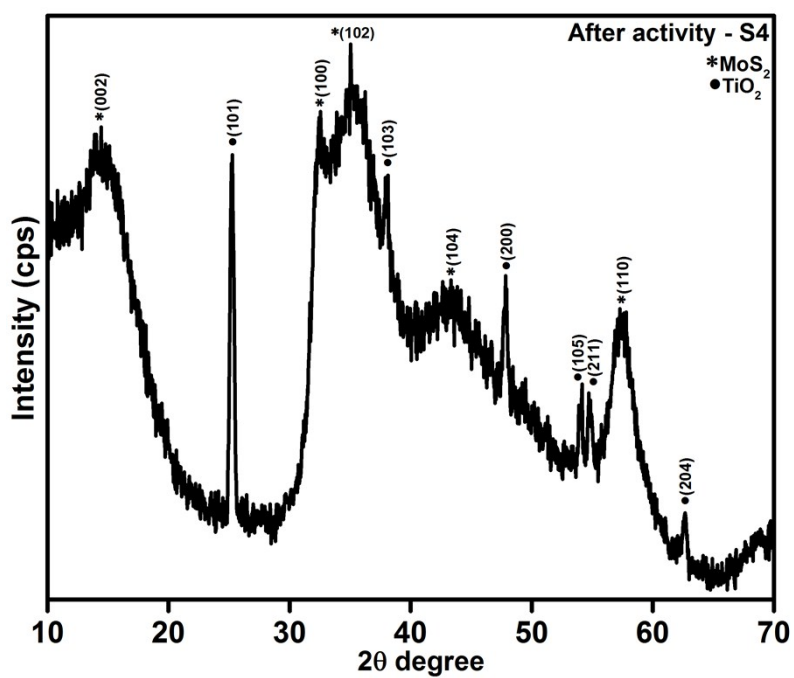

Fig. S1. XRD spectra of sample S4 after photocatalytic reaction.

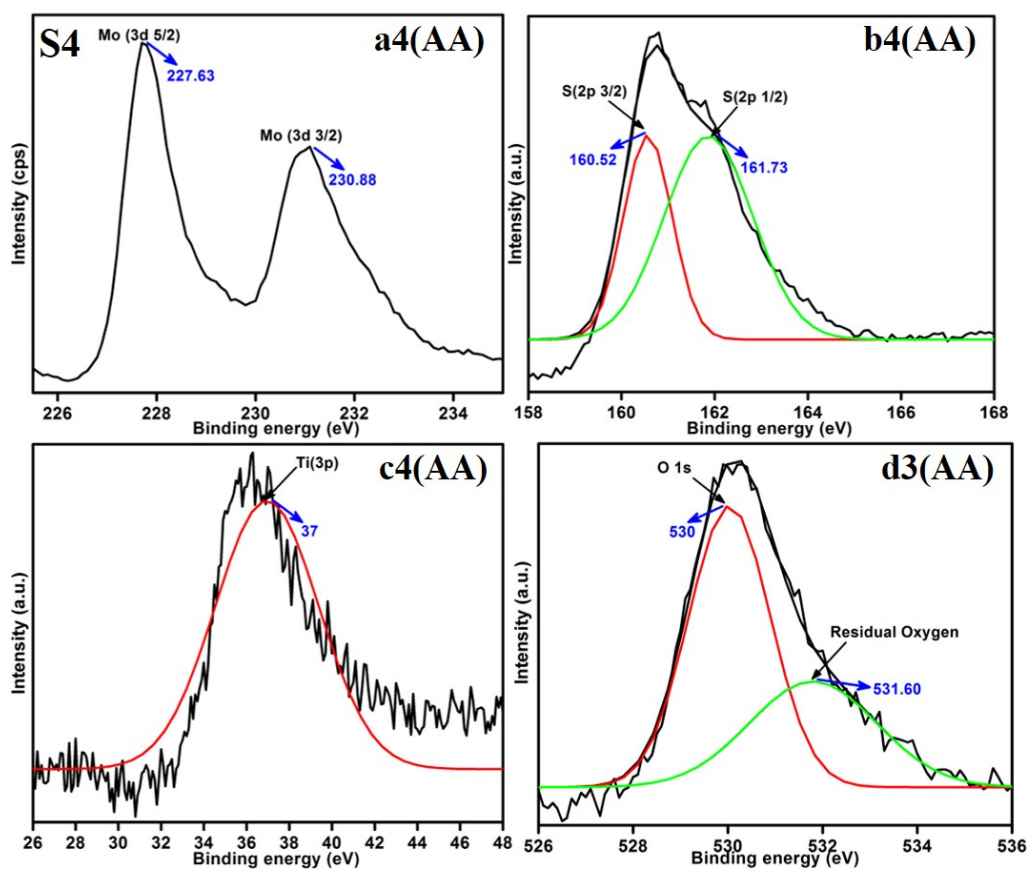

Fig. S2. XPS spectra of (a4) Mo 3d, (b4) S 2p, (c4) Ti 3p and (d3) O 1s state of sample S4 after photocatalytic reaction.
